# Supplementary material
Source: Springer Nature journal article supplement (https://www.springermedizin.de/resource/supplementary/12936_2014_3612_MOESM1_ESM.docx/9546052)
Supplement: MOESM1 [file 9546052]

**Table 1 Univariate analysis of potential risk factors for malaria infection in year 2, as measured by nPCR**

| **Variable** | **N=3,246** | **N (%) with malaria**  **n=1,683** | **Crude OR* (95% CI)** | **Wald test P-value** |
| --- | --- | --- | --- | --- |
| **Age group inyears**  0-4  5-15  16-25  26-35  36+ | 824  1,003  445  334  547 | 349 [42.3]  695 [69.3]  235 [52.8]  337 [44.8]  253 [39.7] | 1  5.04 [3.82-6.63]  2.00 [1.41-2.72]  1.08 [0.76-1.56]  0.87 [0.63-1.19] | <0.001  <0.001  0.661  0.382 |
| **Sex**  Female  Male | 1,896  1,350 | 912 [48.1]  771 [57.1] | 1  1.38 [1.13-1.68] | 0.002 |
| **Sleep under ITN**  No  Yes | 291  2,955 | 191 [65.6]  1,492 [50.5] | 1  0.42 [0.27-0.66] | <0.001 |
| **Wealth quartile**  Poorest  Very poor  Less poor  Least poor | 610  887  930  819 | 337 [61.1]  492 [55.5]  478 [51.4]  340 [41.5] | (Per additional increase in wealth quartile)  0.69 [0.58-0.82] | <0.001 |
| **Maternal education**  None  Primary/+ | 1,545  1,701 | 930 [60.2]  753 [44.3] | 1  0.40 [0.28-0.57] | <0.001 |
| **Breeding site**  No  Yes | 1,650  1,596 | 737 [44.7]  959 [59.3] | 1  2.53 [1.75-3.65] | <0.001 |
| **Household quality**  High  Moderate  Poor | 966  560  1,704 | 439 [45.4]  198 [35.4]  1,038 [60.9] | 1  0.44 [0.26-0.75]  2.32 [1.54-3.50] | 0.002  <0.001 |
| **Indoor residual spraying**  No  Yes | 523  2,723 | 281 [53.7]  1,402 [51.5] | 1  0.98 [0.60-1.60] | 0.925 |
| **Number of cattle**  0-0  1-10  11+ | 1,368  718  1,160 | 676 [49.4]  433 [60.3]  574 [49.5] | 1  1.96 [1.20-3.21]  0.68 [0.45-1.04] | 0.007  0.075 |
| **Distance to health facility**  <1 km  1-2.5km  2.6-3.5km  3.6+ km | 712  934  971  611 | 242 [34.0]  455 [48.7]  556 [57.3]  424 [69.4] | (per additional increase in distance group to health facility)  2.01 [1.69-2.40] | <0.001 |
| **Residence in a hotspot**  **(SaTScan-nPCR)**  Coldspot  Other  Hotspot | 792  1,728  726 | 319 [40.3]  864 [50.0]  500 [68.9] | 1  1.40 [0.91-2.15]  4.44 [2.64-7.46] | 0.125  <0.001 |
| **Residence in a hotspot**  **(SaTScan-AMA-1)**  Coldspot  Other  Hotspot | 904  1,092  1,250 | 310 [34.3]  554 [50.7]  819 [65.5] | 1  2.66 [1.71-4.13]  5.87 [3.79-9.05] | <0.001  <0.001 |
| **Residence in a hotspot**  **(Kernel-nPCR)**  <14.9  15-21.3  21.4-27.1  >27.1 | 804  819  818  805 | 390 [48.5]  387 [47.2]  331 [40.5]  575 [71.4] | 1  0.99 [0.60-1.64]  0.53 [0.32-0.88]  3.45 [2.06-5.75] | 0.966  0.013  <0.001 |
| **Residence in a hotspot**  **(Kernel-AMA-1)**  <27.9  28-38.9  39-53.0  >53.0 | 814  811  814  807 | 309 [38.0]  409 [50.4]  428 [52.6]  537 [66.5] | 1  2.21 [1.34-3.66]  2.61 [1.58-4.31]  5.15 [3.09-8.60] | 0.002  <0.001  <0.001 |

*OR = Odds ratio; adjusted for possible household clustering
